# Supplementary material
Source: MDPI journal article supplement (https://www.mdpi.com/2072-4292/12/4/637)
Supplement: s1 [file s1]

# Supplementary Materials: Extending Landsat 8: Retrieval of an orange *contra*-band for inland water quality applications

Alexandre Castagna<sup>1\*</sup>, Stefan Simis<sup>2</sup>, Heidi Dierssen<sup>3</sup>, Quinten Vanhellemont<sup>4</sup>, Koen Sabbe<sup>1</sup> and Wim Vyverman<sup>1</sup>

## S1. Analytical composite *contra*-band retrieval

The analytical *contra*-band possible with OLI band set is a composite band including signals from the turquoise and orange spectral regions. While it is not suitable for applications due to the mixing of the spectral information from those two regions, it serves as a demonstration of the performance of the retrieval when an analytical solution can be used. As noted in the Appendix A of the companion study, analytical retrievals should be performed in radiance space and then converted to reflectance. To apply that approach to the OWT, the OWT cluster average normalized reflectances were first converted to equivalent radiance by using the average simulated clear sky  $E_d(\lambda, 0^+)$ , and after retrieval of the composite *contra*-band, converted back to reflectance space. Uncertainty as described by the Mean Absolute Percentage Error (MAPE) is 0.4 % for the *in situ* data. In the presence of expected sensor noise, the MAPE increases to 3.88 %, comparable with the mission goal of 3 % maximum error in reflectance. AC error propagate linearly to have about the same magnitude as the red MS band error (slope of 0.994) with a secondary effect of the spectral shape (green to red AC error difference). When AC error is higher in the green than in the red band, AC error in the composite *contra*-band will also be higher than in the red band, by  $\approx 35$  % of the green to red AC error difference. Those retrieval results of the composite band are shown in Fig. S1.

## S2. Application of the current OLI orange *contra*-band algorithm to clear waters

As presented in the discussion section of the main study, only turbid waters were included in the calibration of the algorithm to improve performance for those optical conditions where information of cyanobacteria presence is of particular interest. Addition of clear water spectra in the calibration dataset only reduced performance of the algorithm for turbid waters, while not providing improved performance for clear waters without the addition of the blue MS band (described in the next section). Here we further evaluate the performance of the current algorithm when applied to blue-enhanced waters with a variety of conditions from oligotrophic open ocean to optically complex estuaries and fjords in a total of 81  $R_{rs}$  spectra. Those spectra were measured in the Southern Ocean (Kerguelen Islands; October 2016), Santa Barbara Channel (U.S.; October 2015), Monterey Bay and estuarine waters of Elkhorn Slough (U.S.; July 2012) and fjord waters of Svalbard (Norway; May 2013). Southern Ocean data was collected with a bow-mounted spectrometer system (Satlantic, Halifax, Canada) following [1]. Field radiometric data for the other regions was collected with an handheld spectrometer (ASD) with the plaque method for estimation of irradiance [2]. Skyglint was removed with the approach of [3]. The evaluation of algorithm performance shows a general overestimation of the  $R_{rs}^{orange}$  (bias of 138 %) across these diverse water types, with non-linearity in the lower signal range (Fig. S2). Despite the poor performance, the coefficient of determination is high since statistics are calculated on a linear scale and most overestimations occur over relatively small reflectance values. The evaluation also shows appropriate performance of the proposed algorithm flag ( $R_{rs}^{blue}/R_{rs}^{red} > 2$  and  $R_{rs}^{red} < 0.002 \text{ sr}^{-1}$ ) to exclude spectra for which large errors are expected (red symbols in Fig. S2B). The spectra for Elkhorn Slough included both turbid waters and optically shallow water over seagrass beds [4], both passing the algorithm flag. For those spectra, the  $R_{rs}^{orange}$  was retrieved with a MAPE of 10.5 % ( $N = 11$ , data range from 0.0022 to 0.011  $\text{sr}^{-1}$ ; black symbols in Fig. S2B). Operational methods for filtering shallow water conditions from multispectral data are not yet available.

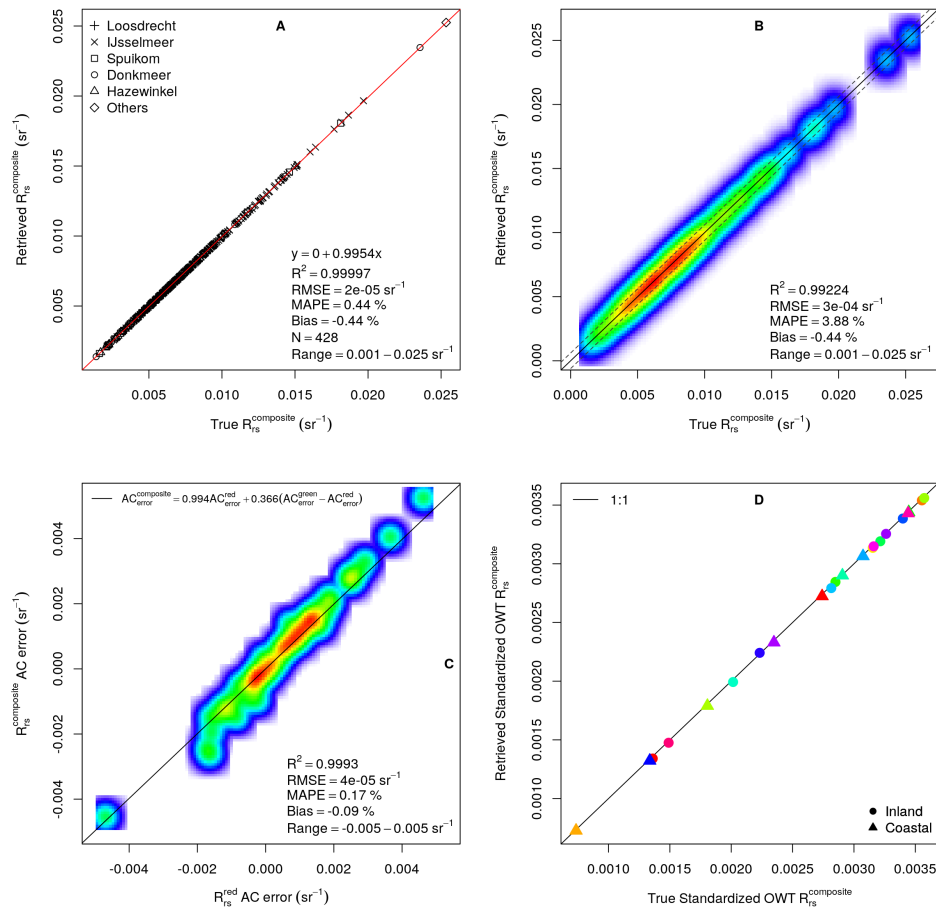

**Figure S1.** Performance of retrieval of the analytical composite band. (A) The retrieval evaluated with the *in situ* data. (B) Effect of spectrally independent random sensor noise. (C) Spectrally structured AC error propagation compared against red MS band AC error. (D) Retrieval for the OWT cluster averages.

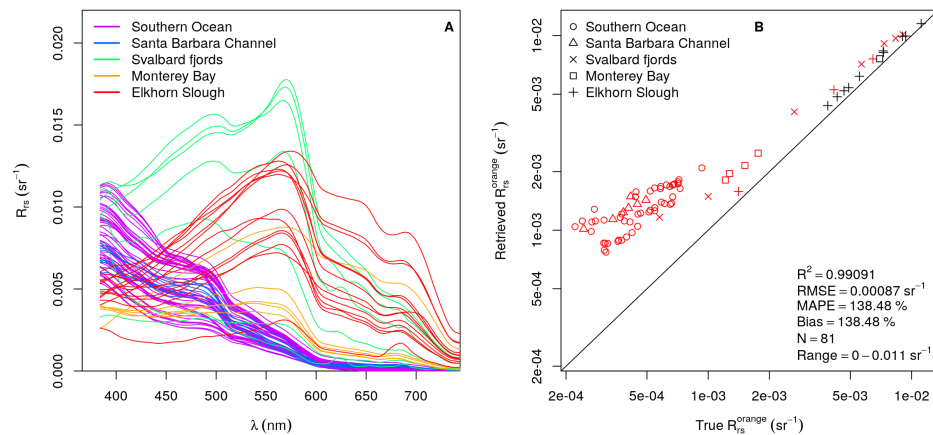

**Figure S2.** Performance of retrieval of the current OLI orange *contra*-band with clear waters. (A) Clear water spectra sampled in marine and transitional waters. (B) OLI  $R_{rs}^{orange}$  retrieval for the clear water spectra. In (B), spectra that would not be processed due to algorithm flag ( $R_{rs}^{blue}/R_{rs}^{red} > 2$  and  $R_{rs}^{red} < 0.002 \text{ sr}^{-1}$ ) is presented in red. Axis in (B) are presented in  $\log_{10}$  spacing.

### S3. Addition of the blue MS band in the *contra*-band retrieval

The other MS bands can be added to the retrieval algorithm, either explicitly or implicitly. The justification to add more bands is the possibility to accommodate blue-enhanced water spectral shapes together with those of turbid waters, by allowing one or two additional parameters tied to the OLI blue bands. Here the retrievals with the addition of the blue MS band (483 nm) are presented (Fig. S3). Since the blue-enhanced spectra represent a fraction of the total spectra, the fitting allowed for equal weights in both datasets. The MAPE of the retrievals with *in situ* data was 3.87 %, similar to the original dataset. While this suggests no gain in performance compared to the turbid dataset, the extended dataset includes very low values of  $R_{rs}^{orange}$  that could negatively impact the performance statistics. Indeed the observed performance is a significant improvement to including blue-enhanced spectra but not the blue MS band (not shown). This gain in performance, however, is overcompensated for in the presence of noise and AC error. In the presence of noise, uncertainty increases to 14.78 % and AC error propagation from the blue band results in increased variability with the AC errors in the adjacent green and red bands, potentially impacting baseline (e.g., OLH) or ratio algorithms for phycocyanin. As can be seen in Fig. S3D, the only OWT cluster not retrieved is the very clear C-2, likely because spectra representative of this cluster were not present in the calibration dataset. To make clear the impact of AC error propagation into the orange *contra*-band when the blue band is included, the lake Erie retrieval is also presented (Fig. S4). Note that the underestimation of the orange signal due to overestimation of turquoise signal from higher undercompensation of atmospheric effects on the blue band when compared with those for the green and red bands results in an increased magnitude of the OLH (and the color scale is changed accordingly). This underestimation of the orange reflectance further intensifies the PC signal in the regions where it is present. However, the Detroit River plume has already enhanced blue reflectance, with the additional AC error propagation, the resulting orange reflectance distance to the green-red baseline is even larger than where PC is present.

### S4. OLI to OLCI $R_{rs}^{orange}$ comparison per lake

The OLI to OLCI  $R_{rs}^{orange}$  comparison and performance statistics is shown per lake in Fig. S5. Details on the matchup conditions are presented in Table S1.

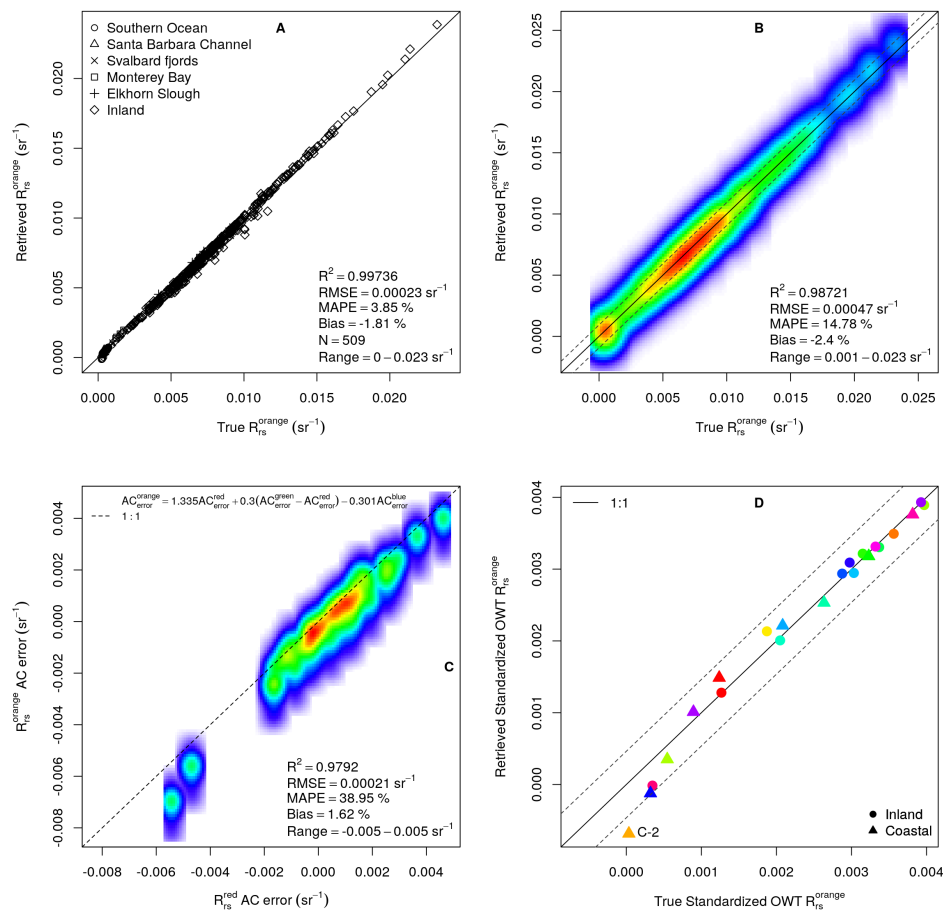

**Figure S3.** Performance of retrieval of the orange *contra*-band when the blue MS band is also included in the retrieval algorithm. (A) The retrieval evaluated with the *in situ* data. (B) Effect of spectrally independent random sensor noise. (C) Spectrally structured AC error propagation. (D) Retrieval for the OWT cluster averages.

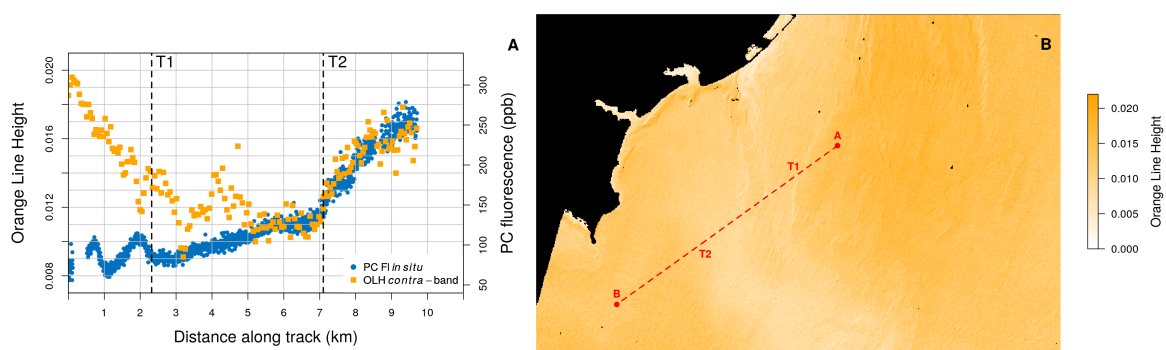

**Figure S4.** Application of the orange *contra*-band, retrieved with the algorithm including the blue MS band, to calculate the OLH in west Lake Erie. Sampling transect starts in the Detroit River plume at point A and ends at point B in the Maumee Bay, passing through two transition points T1 and T2 [5]. (A) Spatial gradient along the transect line for PC fluorescence and OLH calculated with the *contra*-band algorithm including the blue MS band. (B) OLH calculated with the *contra*-band algorithm that includes the blue MS band.

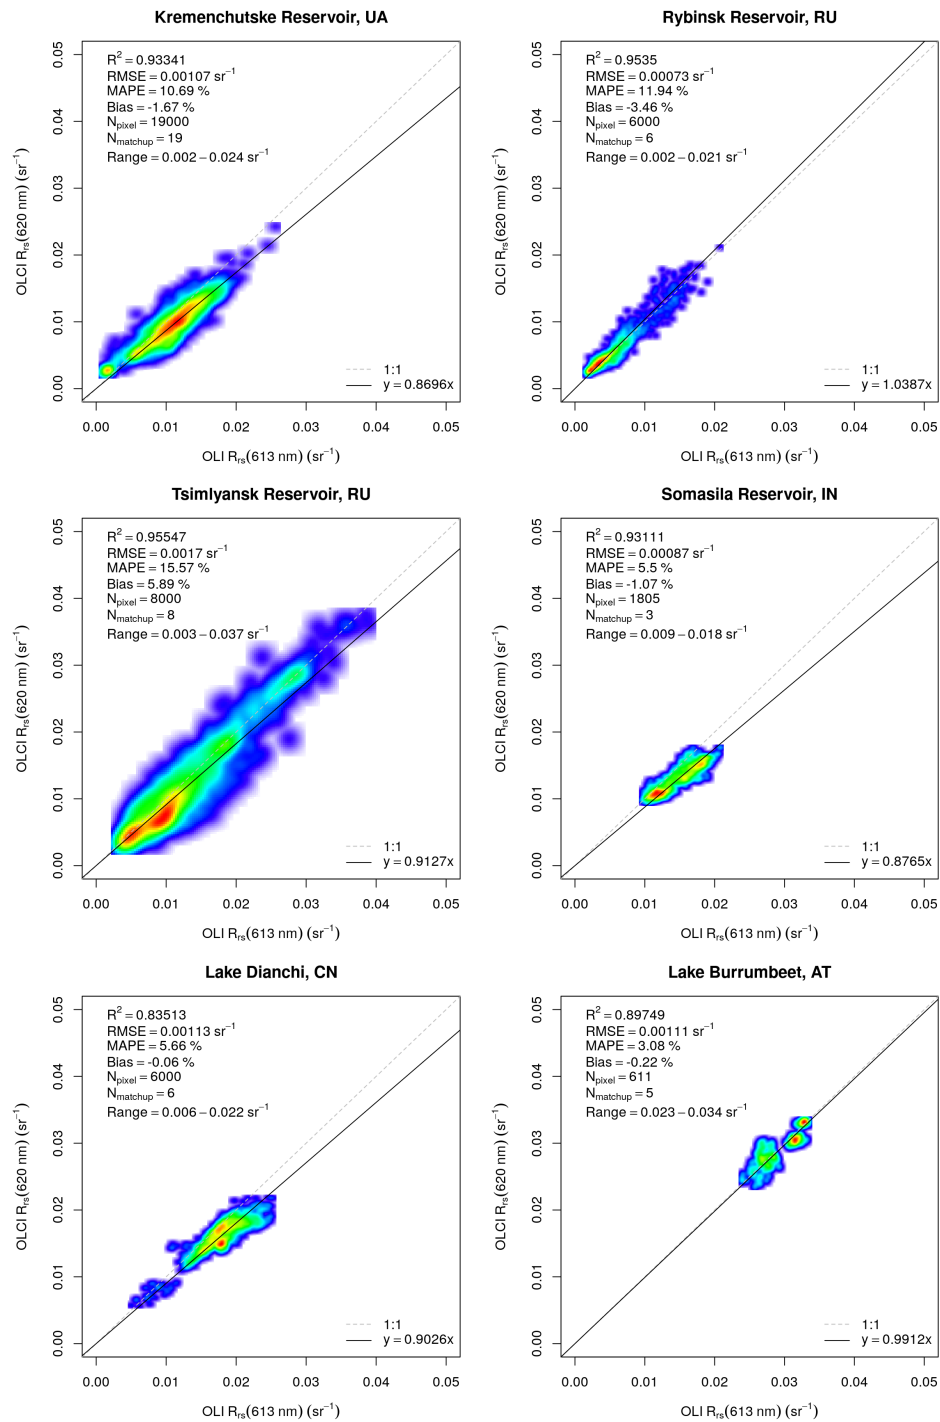

**Figure S5.** Performance of  $R_{rs}^{orange}$  retrieval of the orange *contra*-band against the OLCI orange band per lake.

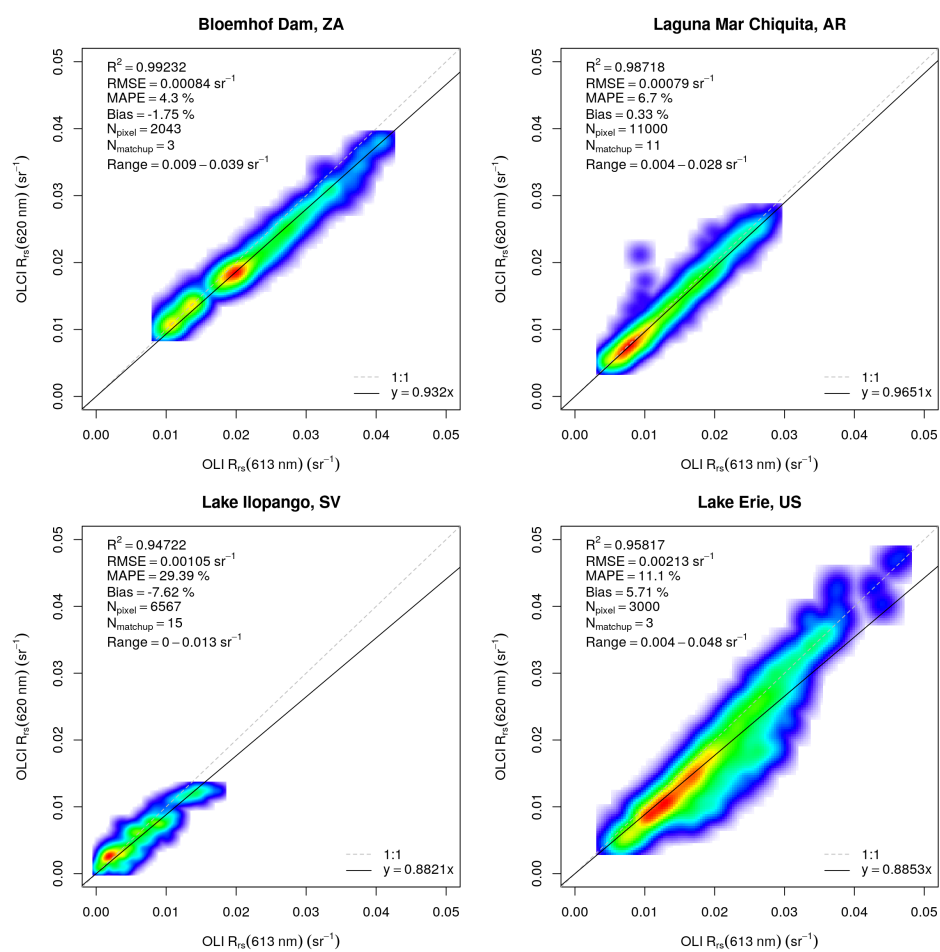

Figure S5. Continued.

**Table S1.** Details on OLI and OLCI scenes matchup. OLI acquisition time is provided in Coordinated Universal Time (UTC) and time difference to OLCI acquisition is provided in minutes. Also provided are the Sun zenith angle ( $\theta_s$ ) and the aerosol optical thickness at 550 nm ( $\tau_a(550)$ ) estimated with ACOLITE for OLI. Only matchups that passed quality control are numbered in the first column.

| Matchup | Lake                 | Date       | UTC Time | Time Diff. | $\theta_s$ | $\tau_a(550)$ |
|---------|----------------------|------------|----------|------------|------------|---------------|
| 1       | Kremenchuk Reservoir | 2016-07-15 | 08:37:10 | 12.5       | 31.31      | 0.099         |
| 2       | Kremenchuk Reservoir | 2016-07-31 | 08:37:14 | 27.6       | 34.38      | 0.045         |
| 3       | Kremenchuk Reservoir | 2016-08-07 | 08:43:26 | 15.0       | 36.05      | 0.087         |
|         | Kremenchuk Reservoir | 2016-08-23 | 08:43:32 | 30.1       | 40.50      | 0.383         |
|         | Kremenchuk Reservoir | 2016-09-08 | 08:43:37 | 45.2       | 45.67      | 0.113         |
| 4       | Kremenchuk Reservoir | 2016-09-24 | 08:43:38 | 60.1       | 51.29      | 0.013         |
|         | Kremenchuk Reservoir | 2017-05-06 | 08:42:43 | 66.6       | 35.00      | 0.042         |
| 5       | Kremenchuk Reservoir | 2017-06-07 | 08:43:03 | -4.1       | 29.44      | 0.118         |
| 6       | Kremenchuk Reservoir | 2017-06-16 | 08:36:56 | 23.5       | 29.07      | 0.057         |
| 7       | Kremenchuk Reservoir | 2017-07-02 | 08:37:00 | 38.5       | 29.70      | 0.130         |
| 8       | Kremenchuk Reservoir | 2017-07-18 | 08:37:04 | 53.5       | 31.76      | 0.107         |
| 9       | Kremenchuk Reservoir | 2017-07-25 | 08:43:19 | 41.1       | 33.06      | 0.052         |
| 10      | Kremenchuk Reservoir | 2017-08-10 | 08:43:25 | 56.1       | 36.76      | 0.102         |
| 11      | Kremenchuk Reservoir | 2017-09-04 | 08:37:20 | -2.3       | 44.25      | 0.177         |
| 12      | Kremenchuk Reservoir | 2018-05-02 | 08:36:23 | 19.2       | 36.22      | 0.121         |
| 13      | Kremenchuk Reservoir | 2018-05-25 | 08:42:17 | 21.3       | 31.02      | 0.093         |
|         | Kremenchuk Reservoir | 2018-06-10 | 08:42:14 | 36.2       | 29.34      | 0.109         |
| 14      | Kremenchuk Reservoir | 2018-06-26 | 08:42:25 | 51.4       | 29.34      | 0.108         |
|         | Kremenchuk Reservoir | 2018-07-12 | 08:42:33 | 66.5       | 30.87      | 0.049         |
| 15      | Kremenchuk Reservoir | 2018-08-06 | 08:36:34 | 8.1        | 35.74      | 0.067         |
| 16      | Kremenchuk Reservoir | 2018-08-13 | 08:42:49 | -4.3       | 37.54      | 0.026         |
| 17      | Kremenchuk Reservoir | 2018-08-22 | 08:36:42 | 23.2       | 40.10      | 0.056         |
| 18      | Kremenchuk Reservoir | 2018-08-29 | 08:42:56 | 10.7       | 42.26      | 0.264         |
| 19      | Kremenchuk Reservoir | 2018-09-14 | 08:43:01 | 25.7       | 47.60      | 0.068         |
| 20      | Rybinsk Reservoir    | 2016-05-05 | 08:27:52 | 66.1       | 43.29      | 0.105         |
| 21      | Rybinsk Reservoir    | 2016-08-09 | 08:28:17 | 55.3       | 44.35      | 0.051         |
| 22      | Rybinsk Reservoir    | 2017-06-09 | 08:27:55 | 36.1       | 36.95      | 0.001         |
| 23      | Rybinsk Reservoir    | 2017-07-11 | 08:28:03 | 66.2       | 38.12      | 0.008         |
| 24      | Rybinsk Reservoir    | 2017-08-12 | 08:28:17 | -4.6       | 45.14      | 0.005         |
| 25      | Rybinsk Reservoir    | 2018-07-30 | 08:27:32 | 20.8       | 41.68      | 0.028         |
|         | Rybinsk Reservoir    | 2018-10-18 | 08:28:06 | -4.9       | 68.78      | 0.016         |
| 26      | Tsimlyansk Reservoir | 2016-10-25 | 08:00:29 | 20.7       | 62.28      | 0.026         |
|         | Tsimlyansk Reservoir | 2017-05-05 | 07:59:26 | -2.8       | 35.28      | 0.104         |
| 27      | Tsimlyansk Reservoir | 2017-05-30 | 07:53:57 | 40.3       | 29.20      | 0.110         |
|         | Tsimlyansk Reservoir | 2017-06-06 | 07:59:47 | 27.5       | 29.51      | 0.058         |
| 28      | Tsimlyansk Reservoir | 2017-08-02 | 07:54:20 | -0.5       | 33.78      | 0.064         |
| 29      | Tsimlyansk Reservoir | 2017-08-18 | 07:54:25 | 14.6       | 37.88      | 0.109         |
|         | Tsimlyansk Reservoir | 2017-09-10 | 08:00:15 | 16.7       | 46.26      | 0.242         |
| 30      | Tsimlyansk Reservoir | 2017-09-19 | 07:54:30 | 44.6       | 48.21      | 0.083         |
|         | Tsimlyansk Reservoir | 2018-04-06 | 07:59:32 | 8.5        | 45.11      | 0.053         |
| 31      | Tsimlyansk Reservoir | 2018-04-15 | 07:53:40 | 36.3       | 40.66      | 0.032         |
| 32      | Tsimlyansk Reservoir | 2018-05-01 | 07:53:31 | 51.1       | 35.43      | 0.023         |
|         | Tsimlyansk Reservoir | 2018-06-18 | 07:53:17 | -5.2       | 28.18      | 0.051         |
|         | Tsimlyansk Reservoir | 2018-08-05 | 07:53:42 | 40.1       | 34.47      | 0.074         |

Table S1 – Continued.

| Matchup | Lake                 | Date       | OLI Time | Time Diff. | $\theta_s$ | $\tau_a(550)$ |
|---------|----------------------|------------|----------|------------|------------|---------------|
| 33      | Tsimlyansk Reservoir | 2018-08-12 | 07:59:33 | 27.2       | 37.27      | 0.069         |
|         | Tsimlyansk Reservoir | 2018-08-21 | 07:53:50 | 55.1       | 38.72      | 0.071         |
|         | Tsimlyansk Reservoir | 2018-08-28 | 07:59:40 | 42.3       | 41.93      | 0.103         |
|         | Tsimlyansk Reservoir | 2018-09-13 | 07:59:45 | 57.3       | 47.25      | 0.090         |
| 34      | Somasila Reservoir   | 2016-08-20 | 05:04:23 | 26.4       | 24.96      | 0.390         |
|         | Somasila Reservoir   | 2016-11-24 | 05:04:38 | 15.4       | 40.89      | 0.206         |
|         | Somasila Reservoir   | 2016-12-26 | 05:04:31 | 45.2       | 44.96      | 0.245         |
|         | Somasila Reservoir   | 2017-03-16 | 05:04:00 | 18.5       | 31.23      | 0.298         |
| 35      | Somasila Reservoir   | 2017-04-01 | 05:03:52 | 33.3       | 27.30      | 0.525         |
|         | Somasila Reservoir   | 2018-03-03 | 05:03:58 | 44.6       | 34.87      | 0.119         |
|         | Somasila Reservoir   | 2018-05-06 | 05:03:24 | 2.9        | 23.37      | 0.371         |
|         | Somasila Reservoir   | 2019-01-01 | 05:04:09 | 26.0       | 45.09      | 0.153         |
| 36      | Somasila Reservoir   | 2019-01-17 | 05:04:07 | 40.9       | 44.28      | 0.309         |
| 37      | Somasila Reservoir   | 2019-02-18 | 05:04:01 | 9.2        | 38.39      | 0.231         |
| 38      | Lake Dianchi         | 2016-10-05 | 03:35:15 | 33.7       | 35.36      | 0.159         |
| 39      | Lake Dianchi         | 2017-01-09 | 03:35:10 | 22.4       | 52.52      | 0.018         |
| 40      | Lake Dianchi         | 2017-05-01 | 03:34:15 | 25.2       | 23.19      | 0.140         |
| 41      | Lake Dianchi         | 2018-03-01 | 03:34:41 | 6.9        | 41.15      | 0.061         |
|         | Lake Dianchi         | 2018-04-02 | 03:34:25 | 36.6       | 30.46      | 0.270         |
|         | Lake Dianchi         | 2019-01-31 | 03:34:45 | 18.1       | 49.34      | 0.117         |
|         | Lake Dianchi         | 2019-02-16 | 03:34:43 | 33.0       | 45.27      | 0.079         |
| 43      | Lake Burrumbeet      | 2016-11-17 | 00:16:09 | -59.8      | 31.55      | 0.071         |
|         | Lake Burrumbeet      | 2017-01-29 | 00:09:42 | -45.8      | 37.37      | 0.029         |
|         | Lake Burrumbeet      | 2017-02-21 | 00:15:43 | -48.1      | 42.46      | 0.045         |
|         | Lake Burrumbeet      | 2017-03-09 | 00:15:36 | -62.9      | 46.47      | 0.145         |
| 44      | Lake Burrumbeet      | 2017-09-17 | 00:15:56 | -40.8      | 49.47      | 0.144         |
|         | Lake Burrumbeet      | 2017-10-03 | 00:16:03 | -55.9      | 43.57      | 0.072         |
|         | Lake Burrumbeet      | 2017-11-29 | 00:09:47 | -27.2      | 30.58      | 0.126         |
|         | Lake Burrumbeet      | 2017-12-15 | 00:09:48 | -42.1      | 30.78      | 0.053         |
| 45      | Lake Burrumbeet      | 2017-12-31 | 00:09:47 | -57.1      | 32.37      | 0.105         |
|         | Lake Burrumbeet      | 2018-01-23 | 00:15:47 | -59.3      | 36.16      | 0.099         |
|         | Lake Burrumbeet      | 2018-11-16 | 00:09:34 | -52.9      | 31.82      | 0.047         |
|         | Lake Burrumbeet      | 2019-01-19 | 00:09:27 | -52.8      | 35.40      | 0.156         |
| 46      | Lake Burrumbeet      | 2019-02-27 | 00:15:30 | -30.9      | 43.83      | 0.178         |
| 48      | Bloemhof Dam         | 2017-01-15 | 08:09:03 | 34.4       | 31.09      | 0.086         |
|         | Bloemhof Dam         | 2017-01-31 | 08:08:57 | 49.3       | 33.35      | 0.049         |
|         | Bloemhof Dam         | 2017-04-05 | 08:08:27 | 7.6        | 45.64      | 0.155         |
|         | Bloemhof Dam         | 2017-04-21 | 08:08:17 | 22.4       | 49.54      | 0.039         |
| 49      | Bloemhof Dam         | 2017-08-18 | 08:15:08 | 14.3       | 51.03      | 0.119         |
|         | Bloemhof Dam         | 2017-08-27 | 08:09:00 | 41.9       | 48.27      | 0.037         |
|         | Bloemhof Dam         | 2017-09-03 | 08:15:11 | 29.3       | 45.97      | 0.064         |
|         | Bloemhof Dam         | 2017-09-19 | 08:15:14 | 44.3       | 40.46      | 0.040         |
| 50      | Bloemhof Dam         | 2017-10-30 | 08:09:12 | 0.9        | 28.59      | 0.046         |
|         | Bloemhof Dam         | 2017-12-01 | 08:09:03 | 30.7       | 26.33      | 0.173         |
|         | Bloemhof Dam         | 2017-12-24 | 08:15:16 | 33.2       | 28.24      | 0.056         |
|         | Bloemhof Dam         | 2018-01-09 | 08:15:11 | 48.0       | 30.26      | 0.036         |
|         | Bloemhof Dam         | 2018-04-15 | 08:14:23 | 36.0       | 48.03      | 0.079         |



Table S1 – Continued.

| Matchup | Lake                | Date       | OLI Time | Time Diff. | $\theta_s$ | $\tau_a(550)$ |
|---------|---------------------|------------|----------|------------|------------|---------------|
|         | Bloemhof Dam        | 2018-09-15 | 08:08:31 | -3.6       | 42.02      | 0.057         |
|         | Bloemhof Dam        | 2018-10-24 | 08:14:58 | 13.9       | 29.96      | 0.043         |
|         | Bloemhof Dam        | 2018-11-02 | 08:08:49 | 41.5       | 28.18      | 0.016         |
|         | Bloemhof Dam        | 2018-11-09 | 08:15:01 | 29.0       | 27.19      | 0.071         |
|         | Bloemhof Dam        | 2018-11-25 | 08:15:00 | 43.9       | 26.28      | 0.096         |
|         | Bloemhof Dam        | 2018-12-27 | 08:14:57 | 12.4       | 28.61      | 0.013         |
|         | Bloemhof Dam        | 2019-01-05 | 08:08:46 | 0.4        | 29.74      | 0.078         |
|         | Bloemhof Dam        | 2019-01-12 | 08:14:56 | 27.3       | 30.67      | 0.066         |
| 51      | Laguna Mar Chiquita | 2016-08-07 | 14:02:00 | 9.7        | 56.38      | 0.007         |
| 52      | Laguna Mar Chiquita | 2016-08-23 | 14:02:06 | 24.7       | 51.81      | 0.020         |
| 53      | Laguna Mar Chiquita | 2016-09-08 | 14:02:11 | 39.8       | 46.43      | 0.015         |
| 54      | Laguna Mar Chiquita | 2017-03-19 | 14:01:38 | 16.7       | 43.83      | 0.022         |
| 55      | Laguna Mar Chiquita | 2017-04-20 | 14:01:22 | 46.4       | 51.83      | 0.004         |
| 56      | Laguna Mar Chiquita | 2017-11-14 | 14:02:13 | 39.7       | 27.87      | 0.176         |
| 57      | Laguna Mar Chiquita | 2017-11-30 | 14:02:07 | 54.6       | 27.22      | 0.067         |
| 58      | Laguna Mar Chiquita | 2018-02-02 | 14:01:50 | 13.2       | 34.78      | 0.054         |
| 59      | Laguna Mar Chiquita | 2018-03-06 | 14:01:37 | 42.9       | 40.86      | 0.088         |
| 60      | Laguna Mar Chiquita | 2018-10-16 | 14:01:49 | 50.4       | 33.82      | 0.025         |
| 61      | Laguna Mar Chiquita | 2019-02-05 | 14:01:44 | 54.1       | 35.27      | 0.104         |
|         | Lake Ilopango       | 2016-07-14 | 16:17:53 | 34.1       | 25.93      | 0.181         |
| 62      | Lake Ilopango       | 2016-10-02 | 16:18:11 | 8.2        | 28.51      | 0.076         |
| 63      | Lake Ilopango       | 2017-02-07 | 16:17:55 | 26.6       | 40.71      | 0.055         |
|         | Lake Ilopango       | 2017-02-23 | 16:17:50 | 41.5       | 36.82      | 0.495         |
|         | Lake Ilopango       | 2017-08-18 | 16:18:00 | 4.3        | 25.01      | 0.170         |
| 64      | Lake Ilopango       | 2017-12-08 | 16:18:05 | 8.1        | 43.39      | 0.113         |
| 65      | Lake Ilopango       | 2017-12-24 | 16:18:07 | 23.1       | 44.90      | 0.037         |
| 66      | Lake Ilopango       | 2018-01-09 | 16:18:02 | 37.9       | 44.83      | 0.054         |
| 67      | Lake Ilopango       | 2018-03-30 | 16:17:24 | 11.1       | 27.71      | 0.181         |
| 68      | Lake Ilopango       | 2018-07-20 | 16:17:08 | 14.6       | 26.02      | 0.162         |
| 69      | Lake Ilopango       | 2018-08-05 | 16:17:17 | 29.7       | 25.54      | 0.069         |
| 70      | Lake Ilopango       | 2018-10-24 | 16:17:49 | 3.9        | 33.49      | 0.045         |
| 71      | Lake Ilopango       | 2018-11-09 | 16:17:52 | 18.9       | 37.52      | 0.049         |
| 72      | Lake Ilopango       | 2018-12-11 | 16:17:49 | 48.9       | 43.78      | 0.040         |
| 73      | Lake Ilopango       | 2018-12-27 | 16:17:49 | 2.3        | 45.03      | 0.042         |
| 74      | Lake Ilopango       | 2019-01-12 | 16:17:47 | 17.3       | 44.68      | 0.101         |
| 75      | Lake Ilopango       | 2019-02-13 | 16:17:41 | 47.1       | 39.49      | 0.126         |
| 76      | Lake Ilopango       | 2019-03-17 | 16:17:31 | 37.3       | 30.99      | 0.136         |
| 77      | Lake Erie           | 2017-09-26 | 16:16:45 | 23.2       | 46.00      | 0.021         |
| 78      | Lake Erie           | 2018-05-08 | 16:15:38 | 29.6       | 29.42      | 0.039         |
| 79      | Lake Erie           | 2018-05-24 | 16:15:26 | 41.3       | 26.38      | 0.154         |
|         | Lake Erie           | 2018-09-29 | 16:16:16 | 60.8       | 46.98      | 0.005         |

1. Balch, W.M.; Drapeau, D.T.; Bowler, B.C.; Lyczkowski, E.; Booth, E.S.; Alley, D. The contribution of coccolithophores to the optical and inorganic carbon budgets during the Southern Ocean Gas Exchange Experiment: New evidence in support of the “Great Calcite Belt” hypothesis. *Journal of Geophysical Research* **2011**, *116*, C00F06. doi:10.1029/2011JC006941.

2. Dierssen, H.M.; Zimmerman, R.C.; Drake, L.A.; Burdige, D. Benthic ecology from space: optics and net primary production in seagrass and benthic algae across the Great Bahama Bank. *Marine Ecology Progress Series* **2010**, *411*, 1–15. doi:10.3354/meps08665.
3. Gould, R.W.; Arnone, R.A.; Sydor, M. Absorption, Scattering, and Remote-Sensing Reflectance Relationships in Coastal Waters: Testing a New Inversion Algorithm. *Journal of Coastal Research* **2001**, *17*, 328–341.
4. Dierssen, H.M.; Bostrom, K.J.; Chlus, A.; Hammerstrom, K.; Thompson, D.; Lee, Z. Pushing the Limits of Seagrass Remote Sensing in the Turbid Waters of Elkhorn Slough, California. *Remote Sensing* **2019**, *11*, 1664. doi:10.3390/rs11141664.
5. Moore, T.S.; Mouw, C.B.; Sullivan, J.M.; Twardowski, M.S.; Burtner, A.M.; Ciochetto, A.B.; McFarland, M.N.; Nayak, A.R.; Paladino, D.; Stockley, N.D.; Johengen, T.H.; Yu, A.W.; Ruberg, S.; Weidemann, A. Bio-optical Properties of Cyanobacteria Blooms in Western Lake Erie. *Frontiers in Marine Science* **2017**, *4*, 1–20. doi:10.3389/fmars.2017.00300.
